# Supplementary material
Source: MDPI journal article supplement (https://www.mdpi.com/2673-1924/5/1/7)
Supplement: s1 [file s1]

# Continuous zonal gradients characterize epipelagic plankton assemblages and hydrography in the subtropical North Atlantic

Antonio Bode\*, M. Ángeles Louro, Elena Rey, Ángel F. Lamas

\* Correspondence: antonio.bode@ieo.csic.es

**Supplementary Figure S1.** Dendrogram of log-transformed mesozooplankton abundance data.

**Supplementary Table S1.** Correlation between environmental variables.

**Supplementary Table S2.** Parameters of the 2<sup>nd</sup> order polynomial relating sea surface temperature, sea surface salinity, mixed layer depth, or the depth of the chlorophyll maximum with geographical longitude.

**Supplementary Table S3.** Values of the slope and intercept of the biomass-normalized plankton spectra for each station.

**Supplementary Table S4.** Values of the linear regression parameters between plankton variables and geographical longitude.

**Supplementary Table S5.** Abundance (indiv. m<sup>-3</sup>) of mesozooplankton taxa.

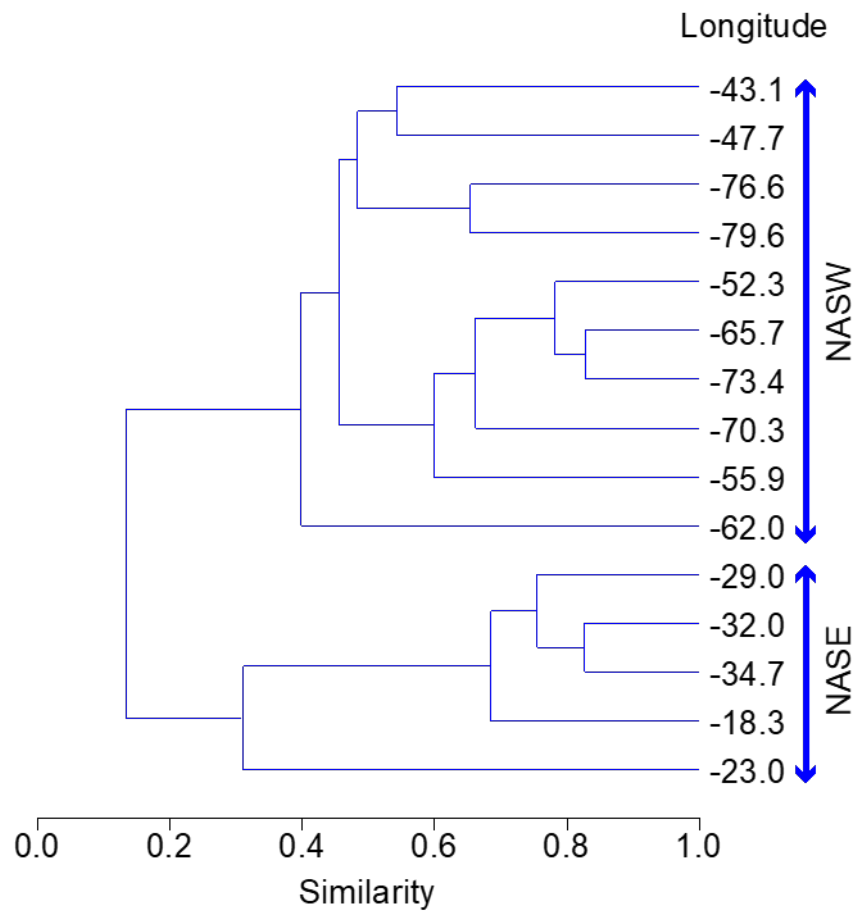

**Figure S1.** Dendrogram of log-transformed mesozooplankton abundance data showing the similarity among stations (identified by geographical longitude values, degrees) of the NASE and NASW provinces.

**Table S1.** Correlation between the environmental variables selected for this study. SST: sea surface temperature; SSS: sea surface salinity; SFluor: surface chlorophyll fluorescence; DCM: depth of the chlorophyll maximum; MLD: mixing layer depth. MLO<sub>2</sub>, MLNO<sub>3</sub>, MLSiO<sub>2</sub>, MLPO<sub>4</sub>, and MLFluor: mixed layer dissolved oxygen, nitrate, silicate, phosphate, and fluorescence, respectively. Significance (P) is indicated in the upper semimatrix and Pearson r coefficients in the lower semimatrix. Significant vales (P<0.05) are indicated in boldface.

|                    | SST           | SSS          | SFluor        | DCM           | MLD          | MLFluor      | MLO <sub>2</sub> | MLNO <sub>3</sub> | MLSiO <sub>2</sub> | MLPO <sub>4</sub> |
|--------------------|---------------|--------------|---------------|---------------|--------------|--------------|------------------|-------------------|--------------------|-------------------|
| SST                | ---           | 0.012        | 0.000         | 0.297         | 0.165        | 0.000        | 0.000            | 0.328             | 0.217              | 0.028             |
| SSS                | <b>-0.386</b> | ---          | 0.353         | 0.003         | 0.000        | 0.194        | 0.329            | 0.984             | 0.862              | 0.001             |
| SFluor             | <b>-0.527</b> | 0.147        | ---           | 0.020         | 0.583        | 0.000        | 0.009            | 0.666             | 0.097              | 0.084             |
| DCM                | 0.165         | <b>0.448</b> | <b>-0.357</b> | ---           | 0.000        | 0.009        | 0.055            | 0.666             | 0.695              | 0.494             |
| MLD                | -0.218        | <b>0.561</b> | 0.087         | <b>0.528</b>  | ---          | 0.415        | 0.538            | 0.196             | 0.201              | 0.004             |
| MLFluor            | <b>-0.558</b> | 0.204        | <b>0.907</b>  | <b>-0.397</b> | 0.129        | ---          | 0.017            | 0.763             | 0.250              | 0.100             |
| MLO <sub>2</sub>   | <b>-0.617</b> | 0.156        | <b>0.403</b>  | -0.301        | -0.099       | <b>0.372</b> | ---              | 0.138             | 0.831              | 0.463             |
| MLNO <sub>3</sub>  | -0.176        | 0.004        | 0.078         | 0.078         | 0.231        | 0.055        | -0.268           | ---               | 0.803              | 0.641             |
| MLSiO <sub>2</sub> | -0.221        | 0.032        | 0.294         | 0.071         | 0.229        | 0.206        | -0.039           | 0.045             | ---                | 0.134             |
| MLPO <sub>4</sub>  | <b>-0.382</b> | <b>0.571</b> | 0.305         | 0.123         | <b>0.486</b> | 0.291        | 0.135            | -0.084            | 0.267              | ---               |

**Table S2.** Parameters of the 2<sup>nd</sup> order polynomial relating sea surface temperature (SST, °C), sea surface salinity (SSS), mixed layer depth (MLD, m), or the depth of the chlorophyll maximum (DCM, m) with geographical longitude (independent variable, degrees). Equations are in the form:  $Y = a_0 + a_1 X + a_2 X^2$ .  $r^2$ : determination coefficient; P: significance. 95% confidence limits (CL) for each coefficient are indicated between parenthesis.

| Dependent variable | $a_0$ (95% CL) |                  | $a_1$ (95% CL) |                  | $a_2$ (95% CL) |                  | $r^2$ | P     |
|--------------------|----------------|------------------|----------------|------------------|----------------|------------------|-------|-------|
| SST                | 18.889         | (17.783, 19.997) | -0.152         | (-0.209, -0.090) | -0.001         | (-0.001, -0.000) | 0.625 | 0.000 |
| SSS                | 36.544         | (35.973, 36.880) | -0.042         | (-0.068, -0.024) | -0.001         | (-0.001, -0.000) | 0.652 | 0.000 |
| MLD                | 55.091         | (5.358, 108.254) | -2.033         | (-4.239, 0.374)  | -0.030         | (-0.052, -0.006) | 0.414 | 0.000 |
| DCM                | 22.676         | (-7.923, 48.622) | -4.784         | (-6.200, -3.489) | -0.051         | (-0.066, -0.038) | 0.516 | 0.000 |

**Table S3.** Values ( $\pm$  se) of the slope (NBSS,  $\log_2$  [individuals  $\text{m}^{-3}$ ]) and intercept (NBSI,  $\log_2$  [individuals  $\text{mg C}^{-1} \text{m}^{-3}$ ]) of the biomass-normalized abundance plankton spectra for each station. r: correlation coefficient; P: significance.

| Station | Date       | Longitude | Latitude | NBSS               | NBSI              | r      | P     |
|---------|------------|-----------|----------|--------------------|-------------------|--------|-------|
| 12      | 29/01/2011 | -15.3478  | 27.1285  | $-1.353 \pm 0.098$ | $5.654 \pm 0.398$ | -0.990 | 0.000 |
| 16      | 30/01/2011 | -16.7797  | 26.6630  | $-1.556 \pm 0.089$ | $7.767 \pm 0.361$ | -0.993 | 0.000 |
| 20      | 31/01/2011 | -18.2703  | 26.1837  | $-1.618 \pm 0.078$ | $6.365 \pm 0.318$ | -0.995 | 0.000 |
| 24      | 01/02/2011 | -20.0092  | 25.6257  | $-1.542 \pm 0.117$ | $5.604 \pm 0.477$ | -0.987 | 0.000 |
| 27      | 02/02/2011 | -21.4565  | 25.1563  | $-1.613 \pm 0.107$ | $6.117 \pm 0.437$ | -0.990 | 0.000 |
| 30      | 03/02/2011 | -22.9763  | 24.6612  | $-1.655 \pm 0.113$ | $6.486 \pm 0.460$ | -0.989 | 0.000 |
| 33      | 04/02/2011 | -24.7080  | 24.5012  | $-1.153 \pm 0.145$ | $4.675 \pm 0.589$ | -0.974 | 0.000 |
| 37      | 05/02/2011 | -27.1497  | 24.5012  | $-1.633 \pm 0.065$ | $6.566 \pm 0.264$ | -0.996 | 0.000 |
| 39      | 06/02/2011 | -28.3718  | 24.5010  | $-1.805 \pm 0.084$ | $6.662 \pm 0.340$ | -0.995 | 0.000 |
| 40      | 07/02/2011 | -28.9843  | 24.4990  | $-1.779 \pm 0.097$ | $5.541 \pm 0.394$ | -0.993 | 0.000 |
| 43      | 08/02/2011 | -30.8183  | 24.4992  | $-1.670 \pm 0.116$ | $6.295 \pm 0.470$ | -0.989 | 0.000 |
| 45      | 09/02/2011 | -32.0403  | 24.5010  | $-1.798 \pm 0.067$ | $6.342 \pm 0.272$ | -0.997 | 0.000 |
| 48      | 10/02/2011 | -33.8727  | 24.5008  | $-1.811 \pm 0.090$ | $5.866 \pm 0.367$ | -0.994 | 0.000 |
| 52      | 11/02/2011 | -34.7195  | 24.4998  | $-1.811 \pm 0.116$ | $6.079 \pm 0.417$ | -0.991 | 0.000 |
| 55      | 12/02/2011 | -37.1078  | 24.5017  | $-1.676 \pm 0.090$ | $6.411 \pm 0.365$ | -0.993 | 0.000 |
| 59      | 13/02/2011 | -38.9537  | 24.4998  | $-1.571 \pm 0.141$ | $5.507 \pm 0.504$ | -0.984 | 0.000 |
| 61      | 14/02/2011 | -39.8760  | 24.5022  | $-1.515 \pm 0.161$ | $5.684 \pm 0.652$ | -0.976 | 0.000 |
| 64      | 15/02/2011 | -41.2633  | 24.4998  | $-1.614 \pm 0.113$ | $6.295 \pm 0.405$ | -0.990 | 0.000 |
| 68      | 16/02/2011 | -43.1097  | 24.5002  | $-1.562 \pm 0.079$ | $6.132 \pm 0.284$ | -0.995 | 0.000 |
| 71      | 17/02/2011 | -44.4953  | 24.4998  | $-1.651 \pm 0.085$ | $6.307 \pm 0.303$ | -0.994 | 0.000 |
| 78      | 19/02/2011 | -47.7278  | 24.5007  | $-1.760 \pm 0.082$ | $6.725 \pm 0.334$ | -0.995 | 0.000 |
| 82      | 20/02/2011 | -49.5755  | 24.5000  | $-1.556 \pm 0.093$ | $6.215 \pm 0.378$ | -0.992 | 0.000 |
| 85      | 21/02/2011 | -50.9612  | 24.5002  | $-1.427 \pm 0.100$ | $5.484 \pm 0.357$ | -0.991 | 0.000 |
| 88      | 22/02/2011 | -52.3467  | 24.5000  | $-1.760 \pm 0.122$ | $6.162 \pm 0.381$ | -0.990 | 0.000 |
| 91      | 23/02/2011 | -54.0342  | 24.4865  | $-2.041 \pm 0.149$ | $6.060 \pm 0.535$ | -0.987 | 0.000 |
| 94      | 24/02/2011 | -55.8743  | 24.5005  | $-1.653 \pm 0.066$ | $6.157 \pm 0.268$ | -0.996 | 0.000 |
| 97      | 25/02/2011 | -57.7157  | 24.5008  | $-1.841 \pm 0.097$ | $6.090 \pm 0.394$ | -0.993 | 0.000 |
| 100     | 26/02/2011 | -59.5530  | 24.5000  | $-1.697 \pm 0.090$ | $6.564 \pm 0.365$ | -0.993 | 0.000 |
| 104     | 27/02/2011 | -62.0047  | 24.5012  | $-1.546 \pm 0.095$ | $6.873 \pm 0.384$ | -0.992 | 0.000 |
| 107     | 28/02/2011 | -63.8430  | 24.5015  | $-1.850 \pm 0.094$ | $6.786 \pm 0.383$ | -0.993 | 0.000 |
| 110     | 01/03/2011 | -65.6820  | 24.5007  | $-1.746 \pm 0.093$ | $6.259 \pm 0.332$ | -0.994 | 0.000 |
| 113     | 02/03/2011 | -67.5202  | 24.4997  | $-1.770 \pm 0.107$ | $6.338 \pm 0.383$ | -0.992 | 0.000 |
| 116     | 03/03/2011 | -69.1327  | 24.5007  | $-1.666 \pm 0.089$ | $5.668 \pm 0.362$ | -0.993 | 0.000 |
| 120     | 05/03/2011 | -70.3220  | 26.2038  | $-1.629 \pm 0.080$ | $6.370 \pm 0.326$ | -0.994 | 0.000 |
| 125     | 06/03/2011 | -72.2647  | 26.2032  | $-1.778 \pm 0.092$ | $6.748 \pm 0.374$ | -0.993 | 0.000 |
| 128     | 07/03/2011 | -73.4317  | 26.2035  | $-1.668 \pm 0.072$ | $6.537 \pm 0.293$ | -0.996 | 0.000 |
| 133     | 08/03/2011 | -75.1557  | 26.2038  | $-1.695 \pm 0.072$ | $7.086 \pm 0.291$ | -0.996 | 0.000 |
| 137     | 09/03/2011 | -75.8622  | 26.2042  | $-1.803 \pm 0.090$ | $6.732 \pm 0.366$ | -0.994 | 0.000 |
| 143     | 10/03/2011 | -76.6218  | 26.2037  | $-1.740 \pm 0.099$ | $7.401 \pm 0.402$ | -0.992 | 0.000 |
| 149     | 11/03/2011 | -76.9525  | 26.2030  | $-1.691 \pm 0.068$ | $7.591 \pm 0.276$ | -0.996 | 0.000 |
| 157     | 13/03/2011 | -79.3063  | 27.0003  | $-1.753 \pm 0.112$ | $7.706 \pm 0.400$ | -0.991 | 0.000 |
| 161     | 13/03/2011 | -79.5658  | 27.0012  | $-1.785 \pm 0.111$ | $7.010 \pm 0.398$ | -0.991 | 0.000 |

**Table S4.** Values of the linear regression parameters between plankton variables and geographical longitude (independent variable, degrees). NBSS ( $\log_2$  [number  $\text{m}^{-3}$ ]) and NBIS ( $\log_2$  [number  $\text{mg C}^{-1} \text{m}^{-3}$ ]): slope and intercept, respectively, of the biomass-normalized plankton spectra; Phytoplankton and Microzooplankton (number  $\text{L}^{-1}$ ) and *Trichodesmium* (trichomes  $\text{L}^{-1}$ ) abundance determined by user-validated FlowCAM images. Mesozooplankton abundance (individuals  $\text{m}^{-3}$ ) determined by microscopy. r: correlation coefficient; P: significance.

| Dependent variable           | a $\pm$ se           | b $\pm$ se         | r      | P     |
|------------------------------|----------------------|--------------------|--------|-------|
| NBSS                         | -2.532 $\pm$ 0.056   | 0.003 $\pm$ 0.001  | 0.393  | 0.010 |
| NBIS                         | 5.675 $\pm$ 0.229    | -0.014 $\pm$ 0.004 | -0.453 | 0.003 |
| Phytoplankton                | 11.874 $\pm$ 20.030  | -1.971 $\pm$ 0.384 | -0.626 | 0.000 |
| Microzooplankton             | 49.515 $\pm$ 23.519  | -2.265 $\pm$ 0.451 | -0.617 | 0.000 |
| <i>Trichodesmium</i>         | 258.160 $\pm$ 28.149 | 3.099 $\pm$ 0.496  | 0.736  | 0.000 |
| Mesozooplankton (all groups) | ---                  | ---                | 0.059  | 0.705 |
| Copepoda (Mesozooplankton)   | ---                  | ---                | -0.270 | 0.330 |
| Tunicata (Mesozooplankton)   | ---                  | ---                | -0.347 | 0.205 |
| Cnidaria (Mesozooplankton)   | ---                  | ---                | 0.141  | 0.617 |
| Other mesozooplankton        | ---                  | ---                | -0.214 | 0.444 |



|                                          |          |       |       |      |      |      |       |       |      |       |        |      |       |      |       |        |
|------------------------------------------|----------|-------|-------|------|------|------|-------|-------|------|-------|--------|------|-------|------|-------|--------|
| <i>Calanus helgolandicus</i> (adults)    | Copepoda | 0.00  | 0.00  | 0.18 | 0.25 | 0.00 | 0.00  | 0.00  | 0.00 | 0.00  | 0.00   | 0.00 | 0.00  | 0.00 | 0.00  | 0.00   |
| <i>Calanus helgolandicus</i> (juveniles) | Copepoda | 1.53  | 3.18  | 0.18 | 0.00 | 0.40 | 0.80  | 1.30  | 0.30 | 0.00  | 0.00   | 0.00 | 0.00  | 0.00 | 1.27  | 0.00   |
| <i>Calocalanus contractus</i>            | Copepoda | 0.00  | 4.78  | 0.00 | 0.00 | 0.00 | 8.80  | 0.00  | 0.00 | 0.00  | 0.00   | 0.00 | 0.00  | 0.00 | 0.00  | 0.00   |
| <i>Calocalanus pavo</i>                  | Copepoda | 0.00  | 0.00  | 0.00 | 0.00 | 0.00 | 0.00  | 1.30  | 0.30 | 2.30  | 7.60   | 0.51 | 0.00  | 0.00 | 0.00  | 5.94   |
| <i>Calocalanus</i> spp.                  | Copepoda | 0.30  | 0.00  | 0.00 | 0.00 | 0.10 | 1.60  | 1.80  | 0.00 | 0.00  | 13.60  | 4.33 | 1.06  | 0.76 | 8.49  | 10.19  |
| <i>Calocalanus styliremis</i>            | Copepoda | 5.10  | 0.80  | 0.55 | 0.13 | 0.90 | 0.00  | 1.50  | 0.10 | 1.30  | 0.00   | 0.00 | 0.00  | 0.00 | 1.27  | 0.00   |
| <i>Candacia bipinnata</i>                | Copepoda | 0.00  | 0.00  | 0.00 | 0.00 | 0.40 | 0.00  | 0.00  | 0.00 | 0.20  | 0.00   | 0.00 | 0.00  | 0.00 | 0.00  | 0.00   |
| <i>Candacia bispinosa</i>                | Copepoda | 0.00  | 3.98  | 0.00 | 0.00 | 0.00 | 0.00  | 0.00  | 0.00 | 0.20  | 0.00   | 0.25 | 0.00  | 0.00 | 0.00  | 2.55   |
| <i>Candacia ketchumi</i>                 | Copepoda | 0.00  | 0.00  | 0.00 | 0.00 | 0.00 | 0.00  | 0.00  | 0.00 | 0.00  | 0.00   | 0.00 | 0.21  | 0.00 | 0.00  | 0.00   |
| <i>Candacia pachydactyla</i>             | Copepoda | 0.00  | 1.59  | 0.00 | 0.00 | 0.00 | 0.00  | 0.00  | 0.00 | 0.00  | 0.00   | 0.00 | 0.00  | 0.00 | 0.00  | 0.00   |
| <i>Candacia simplex</i>                  | Copepoda | 0.00  | 0.00  | 0.00 | 0.00 | 0.00 | 0.00  | 0.00  | 0.00 | 0.00  | 0.00   | 0.00 | 0.00  | 0.00 | 0.00  | 1.70   |
| <i>Candacia</i> spp. (juveniles)         | Copepoda | 0.00  | 1.59  | 0.36 | 0.00 | 0.00 | 0.00  | 0.80  | 0.50 | 0.40  | 0.00   | 0.25 | 0.42  | 0.00 | 0.42  | 1.70   |
| <i>Candacia varicans</i>                 | Copepoda | 0.00  | 0.00  | 0.00 | 0.00 | 0.00 | 0.80  | 0.00  | 0.00 | 0.00  | 0.00   | 0.00 | 0.00  | 0.00 | 0.00  | 0.00   |
| <i>Centropages gracilis</i>              | Copepoda | 0.00  | 0.00  | 0.00 | 0.00 | 0.00 | 0.00  | 0.00  | 0.00 | 0.00  | 0.00   | 0.00 | 0.00  | 0.00 | 0.00  | 0.80   |
| <i>Centropages violaceus</i>             | Copepoda | 0.00  | 1.59  | 0.00 | 0.00 | 0.00 | 0.00  | 0.00  | 0.00 | 0.00  | 0.00   | 0.00 | 0.00  | 0.00 | 0.00  | 0.00   |
| <i>Clausocalanus</i> spp.                | Copepoda | 2.29  | 43.00 | 4.37 | 0.25 | 4.10 | 17.50 | 13.00 | 1.90 | 3.40  | 84.90  | 6.88 | 13.38 | 2.55 | 22.08 | 117.20 |
| <i>Clytemnestra rostrata</i>             | Copepoda | 0.00  | 0.00  | 0.00 | 0.00 | 0.10 | 0.00  | 0.30  | 0.00 | 0.00  | 0.00   | 0.25 | 0.00  | 0.00 | 0.85  | 0.00   |
| Copepoda (juveniles)                     | Copepoda | 17.83 | 61.31 | 8.74 | 5.50 | 9.40 | 30.30 | 17.30 | 4.80 | 13.20 | 102.80 | 8.90 | 12.95 | 7.39 | 59.02 | 165.60 |
| Copepoda (nauplius)                      | Copepoda | 0.00  | 0.00  | 0.18 | 0.00 | 0.10 | 0.80  | 0.00  | 0.00 | 0.00  | 0.80   | 0.00 | 0.42  | 0.00 | 1.27  | 1.70   |
| <i>Copilia quadrata</i>                  | Copepoda | 0.00  | 0.00  | 0.00 | 0.00 | 0.00 | 0.00  | 1.00  | 0.00 | 0.00  | 0.00   | 0.25 | 0.00  | 0.00 | 0.00  | 0.00   |
| <i>Copilia mirabilis</i>                 | Copepoda | 0.76  | 0.00  | 0.00 | 0.00 | 0.00 | 0.00  | 0.00  | 0.00 | 0.00  | 1.70   | 0.00 | 0.00  | 0.00 | 0.00  | 0.00   |
| <i>Corycaeus</i> spp.                    | Copepoda | 1.53  | 7.96  | 3.09 | 0.00 | 1.90 | 6.40  | 9.20  | 1.90 | 4.90  | 30.60  | 3.82 | 3.61  | 2.04 | 18.26 | 49.30  |
| <i>Ctenocalanus vanus</i>                | Copepoda | 0.25  | 3.98  | 0.00 | 0.00 | 0.00 | 0.00  | 0.00  | 0.00 | 0.00  | 0.00   | 0.00 | 0.21  | 0.00 | 0.42  | 11.04  |
| <i>Ditrichocorycaeus anglicus</i>        | Copepoda | 0.25  | 0.00  | 1.46 | 0.00 | 0.50 | 0.00  | 0.00  | 0.00 | 0.20  | 0.00   | 0.00 | 0.00  | 0.00 | 0.00  | 0.00   |
| <i>Eucalanus</i> sp. (juveniles)         | Copepoda | 1.27  | 0.00  | 0.00 | 0.00 | 0.00 | 0.00  | 0.00  | 0.00 | 0.00  | 0.00   | 0.00 | 0.00  | 0.00 | 0.00  | 0.00   |
| <i>Eucalanus spinifer</i>                | Copepoda | 0.00  | 0.80  | 0.00 | 0.00 | 0.00 | 0.00  | 0.00  | 0.00 | 0.00  | 0.00   | 0.00 | 0.00  | 0.00 | 0.00  | 0.00   |
| <i>Euchaeta acuta</i>                    | Copepoda | 0.00  | 0.00  | 0.00 | 0.00 | 0.00 | 1.60  | 0.80  | 0.00 | 0.00  | 2.50   | 0.00 | 0.00  | 0.00 | 0.00  | 1.70   |
| <i>Haloptilus longicornis</i>            | Copepoda | 0.00  | 0.00  | 1.82 | 0.38 | 0.00 | 4.00  | 1.30  | 0.90 | 4.20  | 13.60  | 1.53 | 2.12  | 1.27 | 1.27  | 2.55   |



|                                 |          |       |       |      |      |      |       |       |       |       |        |       |      |      |       |       |
|---------------------------------|----------|-------|-------|------|------|------|-------|-------|-------|-------|--------|-------|------|------|-------|-------|
| <i>Haloptilus</i> spp.          | Copepoda | 0.76  | 4.78  | 0.00 | 0.00 | 0.80 | 1.60  | 0.00  | 0.00  | 0.00  | 0.00   | 0.00  | 0.00 | 0.00 | 0.00  | 0.00  |
| <i>Heterorhabdus norvegicus</i> | Copepoda | 0.00  | 0.00  | 0.00 | 0.00 | 0.00 | 0.00  | 0.00  | 0.00  | 0.00  | 0.00   | 0.00  | 0.42 | 0.00 | 0.00  | 0.00  |
| <i>Heterorhabdus</i> sp.        | Copepoda | 0.00  | 0.80  | 0.00 | 0.00 | 0.00 | 0.00  | 0.00  | 0.00  | 0.80  | 0.00   | 0.00  | 0.00 | 0.00 | 0.00  | 0.00  |
| <i>Heterorhabdus spinifer</i>   | Copepoda | 0.00  | 0.00  | 0.00 | 0.00 | 0.00 | 0.00  | 0.00  | 0.00  | 0.00  | 0.00   | 0.00  | 0.00 | 0.25 | 0.00  | 0.00  |
| <i>Ischnocalanus tenuis</i>     | Copepoda | 0.25  | 0.00  | 0.36 | 0.00 | 0.00 | 0.00  | 0.00  | 0.30  | 0.40  | 3.40   | 0.25  | 0.64 | 0.00 | 0.42  | 0.00  |
| <i>Isias clavipes</i>           | Copepoda | 0.00  | 0.00  | 0.00 | 0.00 | 0.00 | 0.00  | 0.00  | 0.00  | 0.00  | 0.00   | 0.25  | 0.00 | 0.00 | 0.00  | 0.00  |
| <i>Lubbockia</i> sp.            | Copepoda | 0.00  | 6.37  | 1.27 | 0.10 | 0.30 | 0.80  | 0.80  | 0.10  | 0.00  | 0.00   | 0.00  | 0.21 | 0.00 | 0.85  | 4.20  |
| <i>Lucicutia curta</i>          | Copepoda | 0.00  | 0.00  | 0.00 | 0.00 | 0.00 | 1.60  | 0.00  | 0.00  | 0.20  | 0.80   | 0.00  | 0.00 | 0.00 | 0.00  | 5.94  |
| <i>Lucicutia flavicornis</i>    | Copepoda | 1.53  | 17.52 | 0.55 | 0.00 | 0.60 | 0.00  | 7.40  | 1.50  | 7.00  | 11.90  | 2.80  | 4.88 | 0.76 | 11.46 | 0.00  |
| <i>Macrosetella gracillis</i>   | Copepoda | 0.00  | 2.39  | 0.55 | 0.50 | 0.50 | 6.40  | 2.30  | 0.30  | 1.30  | 5.10   | 0.00  | 0.21 | 0.00 | 0.00  | 0.00  |
| <i>Mecynocera clausi</i>        | Copepoda | 1.53  | 6.37  | 2.37 | 0.51 | 0.40 | 0.80  | 1.00  | 0.60  | 1.50  | 4.20   | 0.51  | 0.00 | 0.00 | 5.94  | 0.00  |
| <i>Mesocalanus tenuicornis</i>  | Copepoda | 0.00  | 7.17  | 0.55 | 0.00 | 0.60 | 1.60  | 3.30  | 0.60  | 1.70  | 5.10   | 0.00  | 0.85 | 0.00 | 5.52  | 1.70  |
| <i>Metridia</i> spp.            | Copepoda | 0.00  | 1.59  | 0.00 | 0.00 | 0.30 | 0.00  | 0.00  | 0.00  | 0.00  | 0.00   | 0.00  | 0.00 | 0.00 | 0.00  | 0.00  |
| <i>Microcalanus pygmaeus</i>    | Copepoda | 0.00  | 0.00  | 0.00 | 0.00 | 0.00 | 0.00  | 0.00  | 0.00  | 0.20  | 0.00   | 0.00  | 0.00 | 0.00 | 0.00  | 0.00  |
| <i>Microsetella norvegica</i>   | Copepoda | 0.00  | 1.59  | 0.00 | 0.00 | 0.00 | 3.20  | 0.00  | 0.10  | 0.40  | 0.80   | 0.25  | 0.21 | 0.00 | 0.00  | 0.85  |
| <i>Miracia efferata</i>         | Copepoda | 0.00  | 0.00  | 0.00 | 0.00 | 0.00 | 0.00  | 0.00  | 0.10  | 0.60  | 0.80   | 0.00  | 0.00 | 0.00 | 0.00  | 0.00  |
| <i>Mormonilla phasma</i>        | Copepoda | 0.00  | 0.00  | 0.00 | 0.00 | 0.00 | 0.00  | 0.00  | 0.00  | 0.00  | 0.00   | 0.00  | 0.00 | 0.25 | 0.00  | 0.00  |
| <i>Nannocalanus minor</i>       | Copepoda | 1.27  | 2.39  | 0.00 | 0.80 | 0.30 | 0.00  | 2.00  | 0.10  | 0.40  | 0.00   | 0.00  | 0.00 | 0.00 | 0.00  | 4.25  |
| <i>Neocalanus gracilis</i>      | Copepoda | 0.00  | 0.00  | 0.00 | 0.00 | 0.00 | 0.00  | 0.00  | 0.00  | 0.00  | 0.00   | 0.00  | 0.00 | 0.00 | 0.85  | 0.00  |
| <i>Neocalanus robustior</i>     | Copepoda | 0.00  | 0.00  | 0.00 | 0.13 | 0.00 | 0.00  | 0.30  | 0.10  | 0.20  | 0.00   | 0.00  | 0.00 | 0.00 | 0.00  | 1.70  |
| <i>Oculosetella gracilis</i>    | Copepoda | 0.25  | 0.00  | 0.00 | 0.00 | 0.10 | 0.00  | 0.50  | 0.00  | 0.40  | 0.80   | 0.00  | 0.21 | 0.00 | 0.00  | 0.00  |
| <i>Oithona nana</i>             | Copepoda | 0.00  | 0.00  | 0.00 | 0.00 | 0.00 | 0.00  | 0.30  | 0.00  | 0.00  | 0.00   | 0.00  | 0.42 | 0.00 | 0.00  | 0.00  |
| <i>Oithona plumifera</i>        | Copepoda | 14.27 | 96.34 | 9.65 | 4.08 | 6.10 | 20.00 | 2.80  | 0.30  | 0.40  | 2.50   | 0.00  | 0.00 | 0.00 | 0.00  | 0.00  |
| <i>Oithona setigera</i>         | Copepoda | 0.00  | 1.59  | 0.00 | 0.00 | 0.00 | 0.00  | 0.80  | 0.00  | 0.00  | 1.70   | 0.25  | 0.00 | 0.00 | 0.42  | 0.85  |
| <i>Oithona</i> spp.             | Copepoda | 0.00  | 0.00  | 2.37 | 1.78 | 2.40 | 41.30 | 20.90 | 11.70 | 59.40 | 132.50 | 10.19 | 0.00 | 9.17 | 59.45 | 74.73 |
| <i>Oncaea frosti</i>            | Copepoda | 0.00  | 0.00  | 0.00 | 0.00 | 0.00 | 0.00  | 0.00  | 0.00  | 0.00  | 0.00   | 0.00  | 0.00 | 0.00 | 2.20  | 22.10 |
| <i>Oncaea media</i>             | Copepoda | 0.76  | 0.00  | 0.55 | 0.00 | 0.00 | 0.00  | 1.30  | 0.00  | 0.00  | 0.80   | 0.00  | 0.00 | 0.00 | 1.27  | 0.00  |
| <i>Oncaea</i> spp.              | Copepoda | 1.02  | 44.59 | 0.73 | 0.40 | 0.40 | 1.60  | 1.50  | 0.30  | 0.20  | 0.80   | 1.27  | 4.46 | 1.02 | 2.90  | 10.20 |

|                                      |          |      |      |      |      |      |      |      |      |      |      |      |      |      |      |      |
|--------------------------------------|----------|------|------|------|------|------|------|------|------|------|------|------|------|------|------|------|
| <i>Oncaea venusta</i>                | Copepoda | 0.25 | 4.78 | 0.00 | 0.00 | 0.00 | 0.00 | 0.00 | 0.00 | 0.00 | 0.00 | 0.00 | 0.00 | 0.00 | 0.00 | 0.00 |
| <i>Onychocorycaeus latus</i>         | Copepoda | 0.00 | 0.00 | 0.18 | 0.00 | 0.00 | 0.00 | 0.00 | 0.00 | 0.00 | 0.00 | 0.00 | 0.00 | 0.00 | 0.00 | 0.00 |
| <i>Onychocorycaeus ovalis</i>        | Copepoda | 0.00 | 0.00 | 0.00 | 0.00 | 0.00 | 0.00 | 0.30 | 0.00 | 0.00 | 0.00 | 0.25 | 0.00 | 0.00 | 0.00 | 0.00 |
| <i>Paracalanus denudatus</i>         | Copepoda | 0.00 | 0.00 | 0.00 | 0.00 | 0.00 | 0.00 | 0.00 | 0.00 | 0.00 | 0.80 | 0.00 | 0.00 | 0.51 | 1.27 | 0.00 |
| <i>Paracalanus parvus</i>            | Copepoda | 3.82 | 7.96 | 0.91 | 0.00 | 0.00 | 2.40 | 1.50 | 0.10 | 0.00 | 0.00 | 0.00 | 0.00 | 0.00 | 5.52 | 1.70 |
| <i>Paracalanus</i> sp.               | Copepoda | 0.00 | 0.00 | 0.00 | 0.00 | 0.00 | 0.00 | 0.00 | 0.00 | 0.00 | 0.00 | 0.00 | 0.42 | 0.51 | 0.00 | 2.55 |
| <i>Paraeuchaeta gracilis</i>         | Copepoda | 0.00 | 0.00 | 0.00 | 0.00 | 0.00 | 0.00 | 0.00 | 0.00 | 0.00 | 0.00 | 0.00 | 0.00 | 0.00 | 0.00 | 2.55 |
| <i>Paraeuchaeta hebes</i>            | Copepoda | 0.00 | 0.00 | 0.00 | 0.00 | 0.00 | 0.00 | 0.00 | 0.00 | 0.00 | 0.00 | 0.00 | 0.00 | 0.00 | 1.27 | 0.00 |
| <i>Paraeuchaeta</i> spp. (juveniles) | Copepoda | 0.00 | 0.00 | 0.00 | 0.00 | 0.00 | 0.00 | 1.50 | 0.30 | 0.20 | 1.70 | 0.25 | 0.42 | 0.00 | 0.00 | 0.00 |
| <i>Phaena spinifera</i>              | Copepoda | 0.00 | 0.00 | 0.50 | 0.00 | 0.10 | 0.00 | 0.50 | 0.00 | 0.00 | 0.00 | 0.00 | 0.00 | 0.00 | 0.00 | 0.00 |
| <i>Pleuromamma</i> spp. (juveniles)  | Copepoda | 0.25 | 0.00 | 0.00 | 0.00 | 0.00 | 0.00 | 0.00 | 0.00 | 0.00 | 0.00 | 0.00 | 0.00 | 0.00 | 0.00 | 0.00 |
| <i>Pleuromamma gracilis</i>          | Copepoda | 0.00 | 0.00 | 0.00 | 0.13 | 0.00 | 0.00 | 0.00 | 0.00 | 0.00 | 0.00 | 0.00 | 0.00 | 0.00 | 0.00 | 0.00 |
| <i>Pleuromamma robusta</i>           | Copepoda | 0.00 | 0.00 | 0.00 | 0.00 | 0.00 | 0.00 | 0.00 | 0.00 | 0.00 | 0.00 | 0.00 | 0.00 | 0.25 | 0.00 | 0.00 |
| <i>Pontellina plumata</i>            | Copepoda | 0.51 | 0.00 | 0.00 | 0.00 | 0.00 | 0.00 | 0.00 | 0.00 | 0.00 | 0.00 | 0.00 | 0.00 | 0.00 | 0.00 | 0.00 |
| <i>Rhincalanus nasutus</i>           | Copepoda | 0.51 | 3.98 | 0.00 | 0.00 | 0.00 | 0.00 | 0.00 | 0.00 | 0.00 | 0.00 | 0.00 | 0.00 | 0.00 | 0.42 | 0.00 |
| <i>Sapphirina angusta</i>            | Copepoda | 0.00 | 0.00 | 0.00 | 0.00 | 0.00 | 0.00 | 0.00 | 0.00 | 0.00 | 0.00 | 0.25 | 0.00 | 0.00 | 0.00 | 0.00 |
| <i>Sapphirina opalina</i>            | Copepoda | 0.00 | 0.80 | 0.00 | 0.00 | 0.00 | 0.00 | 0.00 | 0.00 | 0.00 | 0.00 | 0.00 | 0.00 | 0.00 | 0.00 | 0.00 |
| <i>Sapphirina</i> spp.               | Copepoda | 0.00 | 1.59 | 0.00 | 0.00 | 0.00 | 0.00 | 0.30 | 0.00 | 0.00 | 0.00 | 0.00 | 0.00 | 0.00 | 0.00 | 0.00 |
| <i>Scolecithricella dentata</i>      | Copepoda | 0.30 | 0.00 | 0.36 | 0.00 | 0.00 | 0.00 | 0.30 | 0.00 | 0.20 | 0.00 | 0.00 | 0.00 | 0.00 | 0.42 | 0.00 |
| <i>Scolecithricella</i> sp.          | Copepoda | 0.00 | 0.00 | 0.00 | 0.00 | 0.00 | 0.00 | 0.00 | 0.00 | 0.00 | 0.00 | 0.25 | 0.21 | 0.00 | 0.00 | 0.00 |
| <i>Scolecithrix brady</i>            | Copepoda | 0.30 | 0.00 | 0.00 | 0.00 | 0.00 | 0.80 | 0.00 | 0.00 | 0.20 | 0.00 | 0.00 | 0.00 | 0.00 | 0.42 | 0.85 |
| <i>Scolecithrix danae</i>            | Copepoda | 0.00 | 0.00 | 0.00 | 0.00 | 0.00 | 0.00 | 0.00 | 0.00 | 0.00 | 0.00 | 0.00 | 0.00 | 0.00 | 1.27 | 0.85 |
| <i>Scolecithricella ovata</i>        | Copepoda | 0.00 | 0.80 | 0.00 | 0.00 | 0.00 | 0.00 | 0.00 | 0.00 | 0.00 | 0.00 | 0.00 | 0.00 | 0.00 | 0.00 | 0.00 |
| <i>Subeucalanus crassus</i>          | Copepoda | 0.00 | 0.00 | 0.18 | 0.00 | 0.00 | 0.00 | 0.00 | 0.00 | 0.00 | 0.00 | 0.00 | 0.00 | 0.00 | 0.00 | 0.00 |
| <i>Temora</i> sp. (juveniles)        | Copepoda | 0.00 | 0.00 | 0.00 | 0.00 | 0.00 | 0.00 | 0.00 | 0.00 | 0.00 | 0.00 | 0.00 | 0.42 | 0.00 | 0.00 | 0.00 |
| <i>Temora stylifera</i>              | Copepoda | 1.53 | 0.00 | 0.00 | 0.00 | 0.00 | 0.00 | 0.00 | 0.00 | 0.00 | 0.00 | 0.00 | 0.00 | 0.00 | 0.00 | 2.55 |
| <i>Temoropia mayunbaensi</i>         | Copepoda | 0.00 | 0.00 | 0.00 | 0.00 | 0.00 | 0.00 | 0.00 | 0.00 | 1.50 | 0.00 | 0.00 | 0.21 | 0.00 | 0.42 | 0.00 |
| <i>Triconia conifera</i>             | Copepoda | 0.00 | 0.00 | 0.00 | 0.00 | 0.10 | 0.00 | 0.00 | 0.00 | 0.00 | 0.00 | 0.00 | 0.00 | 0.00 | 0.00 | 0.00 |

|                                |               |       |       |      |      |      |      |      |      |      |      |      |      |      |       |      |
|--------------------------------|---------------|-------|-------|------|------|------|------|------|------|------|------|------|------|------|-------|------|
| <i>Undinula vulgaris</i>       | Copepoda      | 0.00  | 0.00  | 0.00 | 0.00 | 0.00 | 0.00 | 0.00 | 0.00 | 0.00 | 1.70 | 0.00 | 0.00 | 0.00 | 0.00  | 0.00 |
| <i>Urocorycaeus</i> sp.        | Copepoda      | 0.00  | 0.00  | 0.00 | 0.00 | 0.00 | 0.00 | 0.00 | 0.00 | 0.20 | 0.00 | 0.00 | 0.00 | 0.00 | 0.00  | 0.00 |
| Decapoda (larvae)              | Decapoda      | 0.76  | 3.98  | 0.36 | 0.00 | 0.10 | 0.80 | 1.30 | 0.10 | 1.30 | 0.80 | 0.00 | 1.06 | 0.00 | 1.27  | 2.55 |
| <i>Lucifer</i> sp. (larvae)    | Decapoda      | 0.25  | 0.00  | 0.00 | 0.00 | 0.00 | 0.00 | 0.00 | 0.00 | 0.00 | 0.00 | 0.00 | 0.00 | 0.00 | 0.00  | 0.00 |
| Doliolida                      | Doliolida     | 2.04  | 2.39  | 0.36 | 0.00 | 0.10 | 0.00 | 1.30 | 0.60 | 0.60 | 5.10 | 0.00 | 0.64 | 0.00 | 0.85  | 0.00 |
| Echinodermata (larvae)         | Echinodermata | 0.00  | 0.00  | 0.00 | 0.00 | 0.00 | 2.40 | 0.30 | 0.50 | 0.00 | 2.50 | 0.25 | 0.00 | 0.25 | 2.97  | 2.55 |
| Euphausiacea (other)           | Euphausiacea  | 0.00  | 1.59  | 0.18 | 0.00 | 0.00 | 0.00 | 0.00 | 0.00 | 0.00 | 0.00 | 0.00 | 0.21 | 0.00 | 0.00  | 0.00 |
| Euphausiacea (larvae)          | Euphausiacea  | 0.00  | 0.80  | 0.55 | 0.25 | 0.30 | 0.00 | 1.30 | 0.40 | 0.80 | 3.40 | 0.00 | 0.42 | 0.00 | 0.42  | 1.70 |
| Branchiostomatidae (larvae)    | Fish          | 0.00  | 0.00  | 0.00 | 0.00 | 0.00 | 0.00 | 0.00 | 0.00 | 0.00 | 0.00 | 0.00 | 0.21 | 0.00 | 0.00  | 0.00 |
| Fish (eggs)                    | Fish          | 0.00  | 0.00  | 0.00 | 0.00 | 0.00 | 0.00 | 0.00 | 0.00 | 0.20 | 0.00 | 0.00 | 0.00 | 0.00 | 1.70  | 0.00 |
| Fish (larvae)                  | Fish          | 0.00  | 0.00  | 0.00 | 0.00 | 0.00 | 0.00 | 0.00 | 0.00 | 0.40 | 0.00 | 0.00 | 0.00 | 1.00 | 1.27  | 0.00 |
| Foraminifera                   | Foraminifera  | 1.53  | 14.33 | 1.09 | 0.00 | 0.51 | 2.40 | 1.30 | 0.40 | 0.60 | 0.00 | 0.00 | 0.21 | 0.51 | 0.00  | 0.00 |
| Gastropoda (larvae)            | Gastropoda    | 0.51  | 1.59  | 0.36 | 0.13 | 0.10 | 0.00 | 1.00 | 0.00 | 0.60 | 0.00 | 1.02 | 1.06 | 0.51 | 1.27  | 2.55 |
| <i>Conchoecia</i> spp.         | Ostracoda     | 1.78  | 15.13 | 1.27 | 0.00 | 0.51 | 3.20 | 2.80 | 0.60 | 3.40 | 1.70 | 1.02 | 2.76 | 1.02 | 10.19 | 5.94 |
| Alciopidae (larvae)            | Polychaeta    | 0.00  | 0.00  | 0.00 | 0.00 | 0.10 | 0.00 | 0.30 | 0.00 | 0.00 | 0.00 | 0.00 | 0.00 | 0.00 | 0.00  | 0.00 |
| Polychaeta (other larvae)      | Polychaeta    | 0.00  | 0.00  | 0.00 | 0.00 | 0.00 | 0.00 | 0.00 | 0.10 | 0.20 | 0.00 | 0.00 | 0.64 | 0.00 | 3.40  | 5.10 |
| <i>Tomopteris</i> sp. (larvae) | Polychaeta    | 0.00  | 0.80  | 0.00 | 0.00 | 0.00 | 0.00 | 0.30 | 0.00 | 0.20 | 0.00 | 0.00 | 0.00 | 0.00 | 0.00  | 0.00 |
| Pteropoda                      | Pteropoda     | 0.00  | 0.80  | 0.00 | 0.00 | 0.00 | 0.00 | 0.30 | 0.40 | 0.00 | 0.80 | 0.00 | 0.21 | 0.51 | 0.00  | 0.00 |
| Salpida                        | Salpida       | 0.00  | 0.80  | 0.00 | 0.00 | 0.00 | 5.60 | 0.30 | 0.10 | 0.00 | 0.00 | 0.00 | 1.27 | 0.00 | 1.70  | 1.70 |
| Siphonophora                   | Siphonophora  | 12.74 | 11.15 | 0.55 | 0.76 | 0.80 | 3.20 | 2.80 | 1.30 | 4.70 | 4.20 | 0.76 | 2.76 | 1.02 | 7.22  | 9.34 |
